# Supplementary material
Source: HighWire-hosted journal article supplement (https://bmjopen.bmj.com/content/12/8/e061208)
Supplement: inline-supplementary-material-3 [file inline-supplementary-material-3.pdf]

**Supplemental file 3: Patient's demographics and clinical characteristics after excluding urgent and emergency surgeries. Comparison between operated and non-operated patients.**

|                                       | Non-Operated                                                                                                            | Operated                                  | Comparison between groups (p value) |
|---------------------------------------|-------------------------------------------------------------------------------------------------------------------------|-------------------------------------------|-------------------------------------|
| <b>Number of patients</b>             | 680                                                                                                                     | 600                                       |                                     |
| <b>Age (Median. IQR)</b>              | 56 (21)                                                                                                                 | 55 (26)                                   | 0.755                               |
| <b>Sex</b>                            | Males 350 (51.5%)<br>Females 330 (48.5%)                                                                                | Males 320 (53.3%)<br>Females 280 (46.7%)  | 0.505                               |
| <b>Epidemiological week</b>           | 4 (7)                                                                                                                   | 9 (17)                                    | <0.001                              |
| <b>Community SARS-CoV-2 incidence</b> | 7 (31)                                                                                                                  | 14 (10)                                   | <0.001                              |
| <b>Weight/ BMI</b>                    | 75Kg (21)/<br>29.5 Kg/m2 (6.3)                                                                                          | 73 Kg (21)<br>26.6 Kg/m2 (10)             | 0.132<br>0.060                      |
| <b>ASA grade</b>                      | <b>Unknown</b> 9 (1.3%)<br><b>Grades I and II</b> 521 (76.7%)<br><b>Grades III and IV</b> 149 (22%)<br><b>Grade V</b> 0 | 1 (0.2%)<br>419 (69.8%)<br>180 (30%)<br>0 | <0.001                              |
| <b>Past medical history</b>           |                                                                                                                         |                                           |                                     |
| None                                  | 164 (24.1%)                                                                                                             | 141 (23.5%)                               | 0.796                               |
| Hypertension                          | 245 (36%)                                                                                                               | 184 (30.7%)                               | 0.043                               |
| Diabetes                              | 88 (12.9%)                                                                                                              | 91 (15.2%)                                | 0.252                               |
| DL                                    | 48 (7.1%)                                                                                                               | 53 (8.8%)                                 | 0.240                               |
| Current smoker                        | 160 (23.5%)                                                                                                             | 93 (15.5%)                                | <0.001                              |
| Chronic Obstructive Pulmonary Disease | 37 (5.4%)                                                                                                               | 22 (3.7%)                                 | 0.131                               |
| Asthma                                | 39 (5.7%)                                                                                                               | 17 (2.8%)                                 | 0.011                               |
| Ischemic heart disease                | 32 (4.7%)                                                                                                               | 19 (3.2%)                                 | 0.160                               |
| Obesity                               | 31 (4.6%)                                                                                                               | 11 (1.8%)                                 | 0.006                               |
| Congestive heart failure              | 20 (2.9%)                                                                                                               | 9 (1.5%)                                  | 0.084                               |
| Chronic kidney disease                | 22 (3.2%)                                                                                                               | 10 (1.7%)                                 | 0.073                               |
| Arrhythmia                            | 5 (0.7%)                                                                                                                | 13 (2.2%)                                 | 0.030                               |
| <b>Specific pathology</b>             |                                                                                                                         |                                           |                                     |
| Oncology                              | 58 (8.5%)                                                                                                               | 261 (43.5%)                               | <0.001                              |
| Degenerative spine                    | 470 (69.1%)                                                                                                             | 155 (25.8 %)                              |                                     |
| TBI                                   | 5 (0.7%)                                                                                                                | 14 (2.3%)                                 |                                     |
| Hemorrhagic cerebrovasc               | 17 (2.5%)                                                                                                               | 43 (7.2%)                                 |                                     |
| CSF                                   | 25 (3.7%)                                                                                                               | 44 (7.3%)                                 |                                     |
| Functional                            | 86 (12.6%)                                                                                                              | 42 (7%)                                   |                                     |
| Traumatic spine injury                | 6 (0.9%)                                                                                                                | 19 (3.2%)                                 |                                     |
| Infectious                            | 2 (0.3%)                                                                                                                | 7 (1.2%)                                  |                                     |
| Pediatric-specific                    | 11 (1.6%)                                                                                                               | 40 (6.7 %)                                |                                     |
| <b>Priority of the surgery</b>        |                                                                                                                         |                                           |                                     |
| <b>Expedite (&lt; 4 weeks)</b>        | 34 (5%)                                                                                                                 | 248 (41.3%)                               | <0.001                              |
| <b>Elective (&gt; 4 weeks)</b>        | 646 (95%)                                                                                                               | 352 (58.7%)                               |                                     |
| <b>SARS-CoV2 infection</b>            |                                                                                                                         |                                           |                                     |
| Not confirmed/ suspected              | 674 (99.1%)                                                                                                             | 586 (97.7%)                               | NA                                  |
| Awaiting surgery                      | 6 (0.9%)                                                                                                                | 4 (0.7%)                                  |                                     |
| Preoperatively screening              | 0                                                                                                                       | 1 (0.2%)                                  |                                     |
| In-hospital admission                 | 0                                                                                                                       | 3 (0.5%)                                  |                                     |
| After hospital discharge <30d         | 0                                                                                                                       | 6 (1%)                                    |                                     |

|                               |   |   |
|-------------------------------|---|---|
| After hospital discharge >30d | 0 | 0 |
|-------------------------------|---|---|
